# Supplementary material
Source: Springer Nature journal article supplement (https://www.springermedizin.de/resource/supplementary/13058_2013_3451_MOESM9_ESM.pdf/9704056)

**A****EP (low risk group)**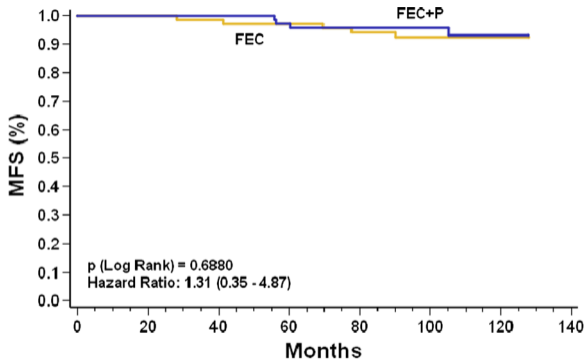

| No. at Risk | 0  | 20 | 40 | 60 | 80 | 100 | 120 | 140 |
|-------------|----|----|----|----|----|-----|-----|-----|
| FEC         | 69 | 69 | 68 | 65 | 60 | 51  | 8   | 0   |
| FEC+P       | 72 | 72 | 71 | 68 | 65 | 51  | 13  | 0   |

**B****EP (high risk group)**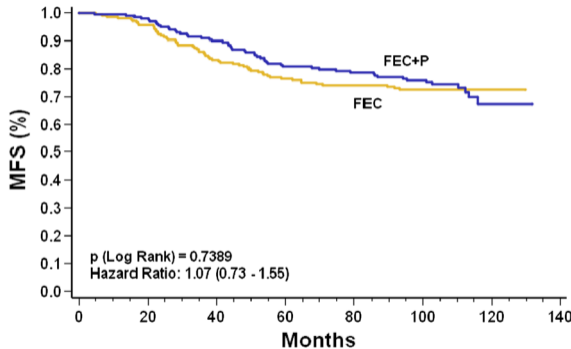

| No. at Risk | 0   | 20  | 40  | 60  | 80  | 100 | 120 | 140 |
|-------------|-----|-----|-----|-----|-----|-----|-----|-----|
| FEC         | 211 | 200 | 173 | 158 | 147 | 117 | 21  | 0   |
| FEC+P       | 203 | 197 | 177 | 159 | 146 | 116 | 17  | 0   |

Supplement: MOESM9 [file 9704056]
